# Supplementary figures and images for: Molecular mechanism of thermosensory function of human heat shock transcription factor Hsf1
Source: eLife journal article supplement (doi:10.7554/elife.11576), 2016-01-19

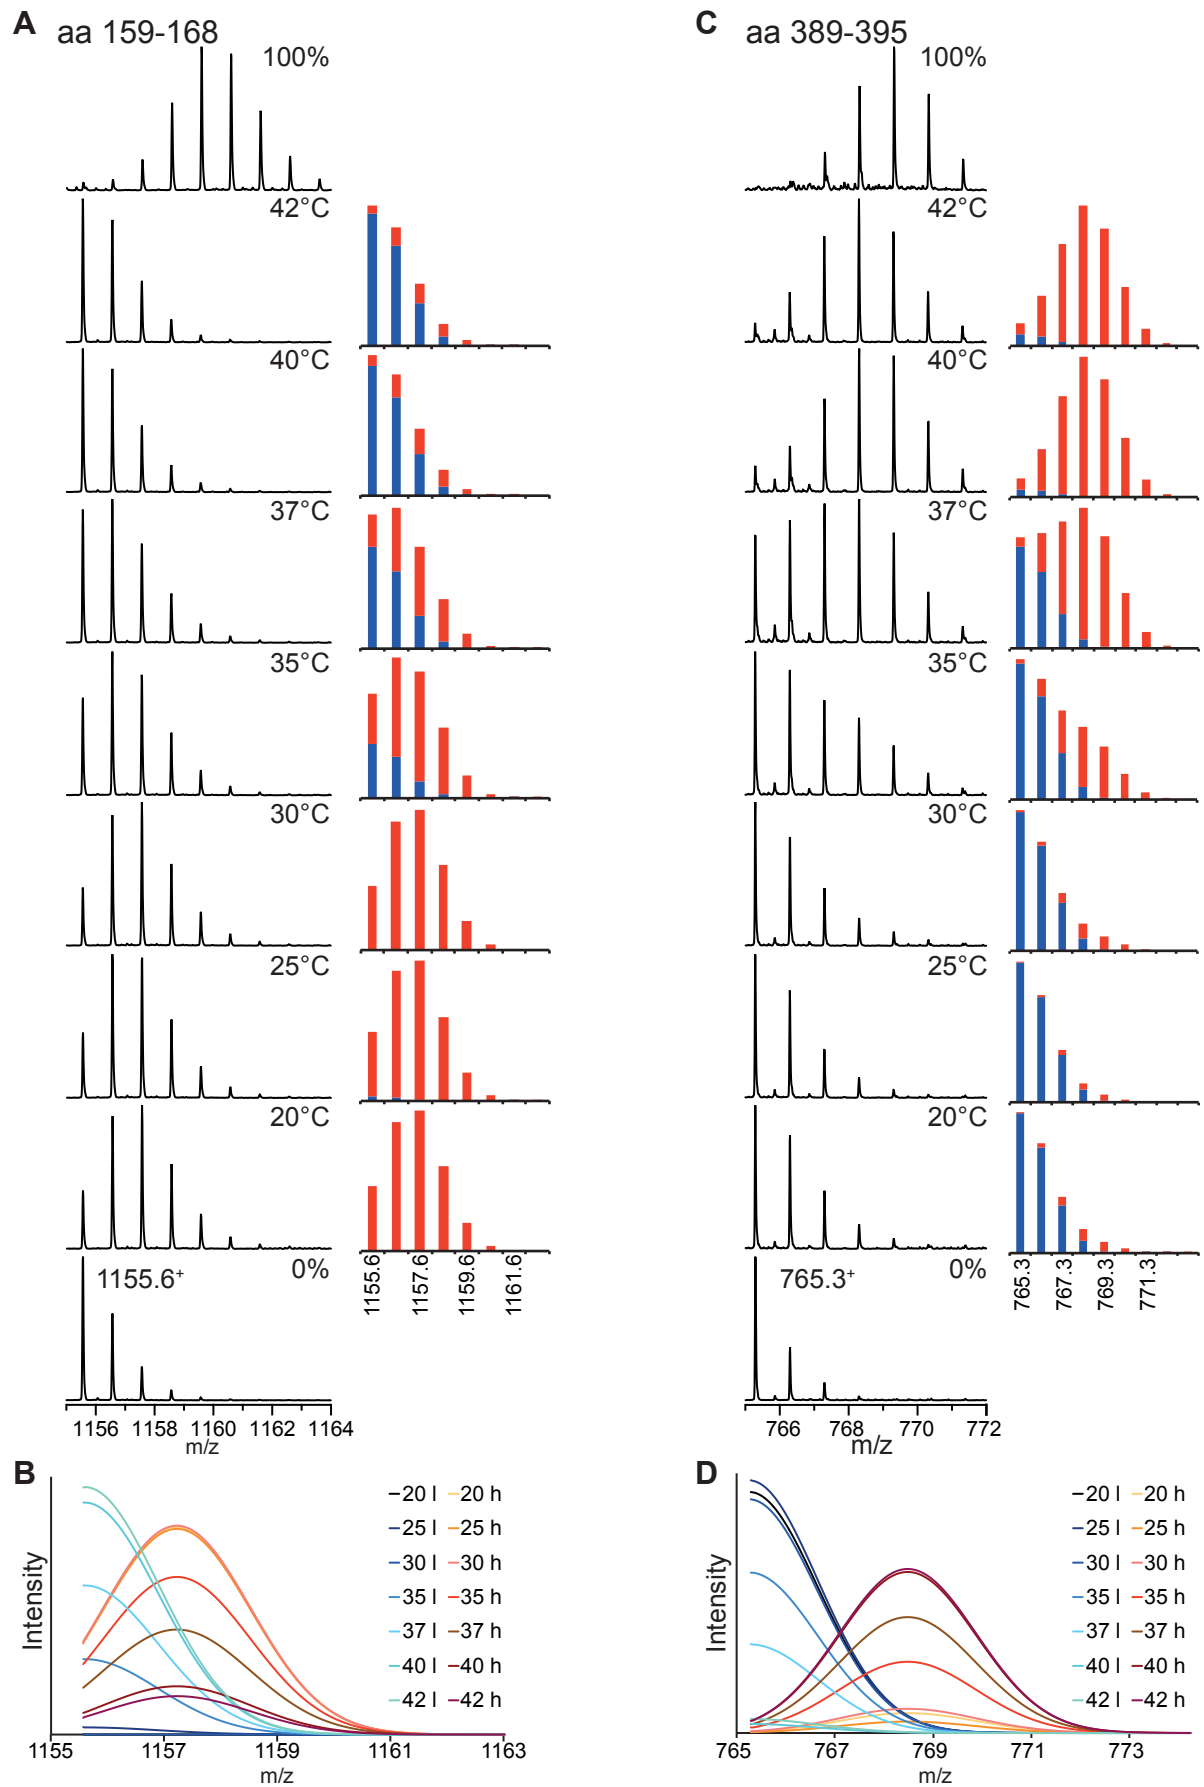

Supplement: supp [file elife-11576-supp-v1.zip]

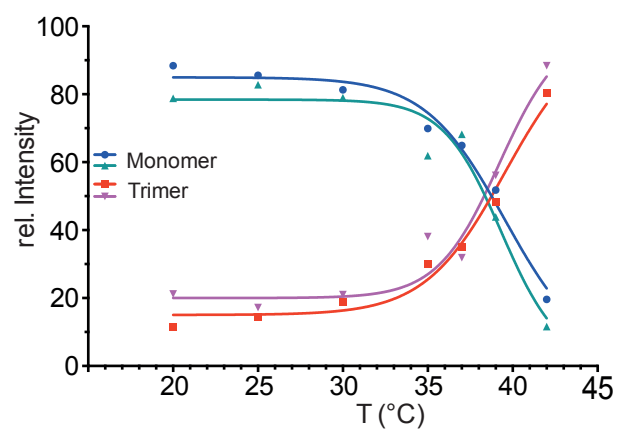

Supplement: supp [file elife-11576-supp-v1.zip]

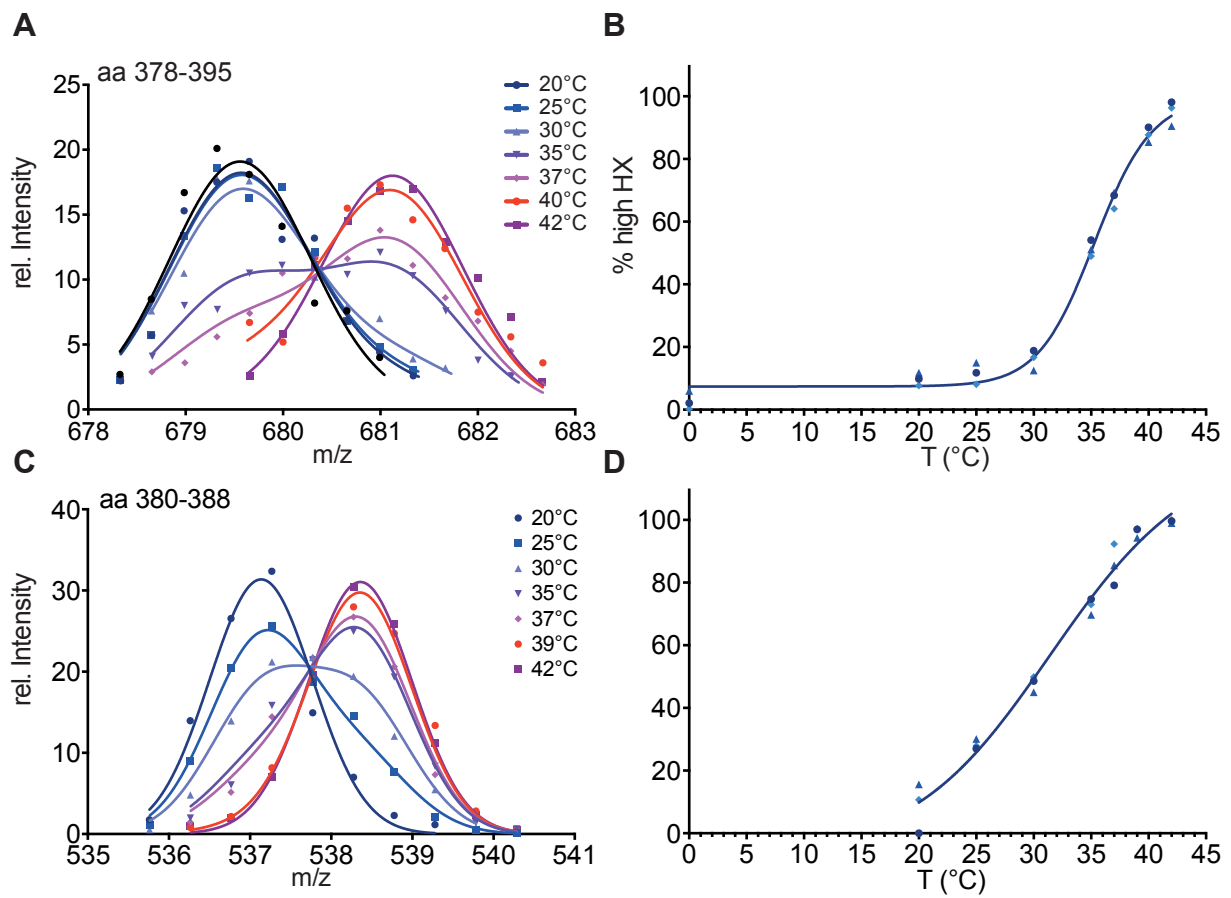

Supplement: supp [file elife-11576-supp-v1.zip]

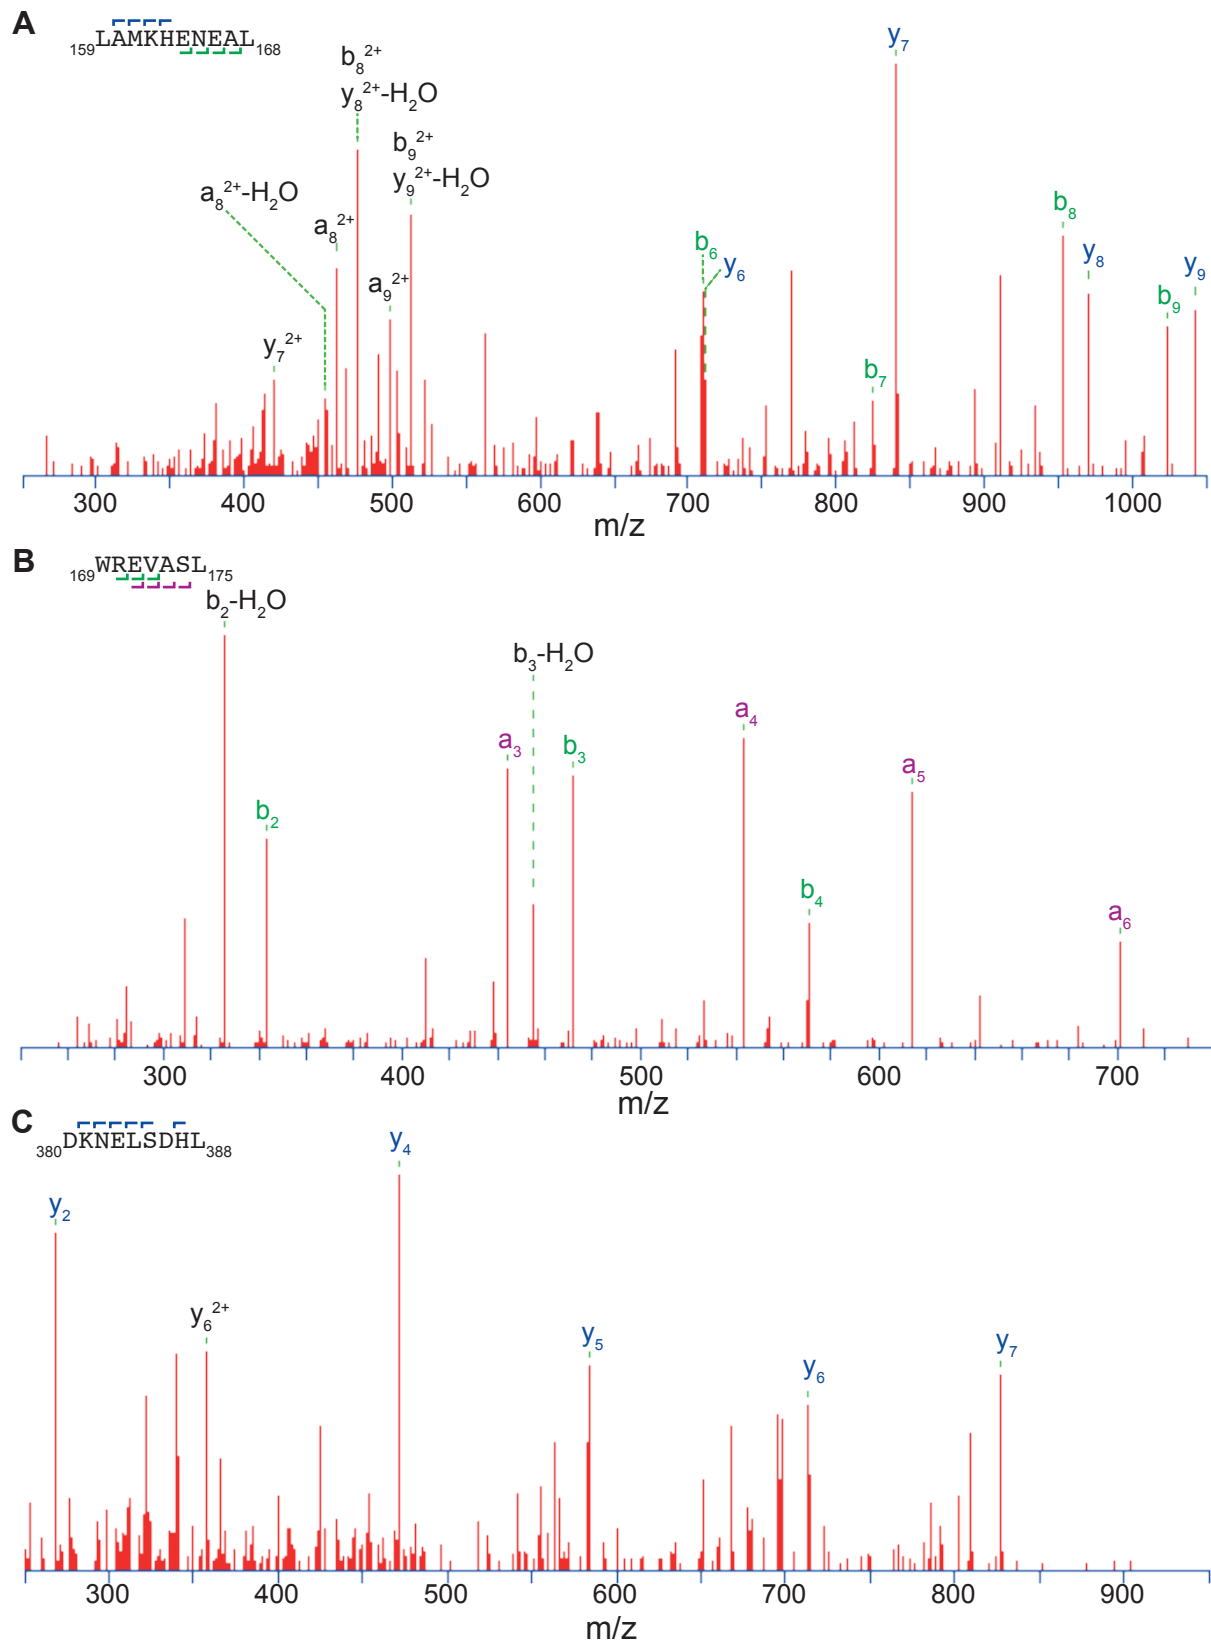

Supplement: supp [file elife-11576-supp-v1.zip]
